# Supplementary material for: Case Study 2: A 60-Year-Old Man With Progressive Deficits in Language Output
Source: Atypon-hosted journal article supplement (doi:10.1176/appi.neuropsych.22010013), 2022-07-01
Supplement: appi.neuropsych.22010013.ds001.pdf [file appi.neuropsych.22010013.ds001.pdf]

**Supplemental Figure 1.** Brain MRI, 2 years after symptom onset (age 60). Coronal T1-weighted sequences. *A*: Focal atrophy in left superior frontal gyrus (SFG), anterior region. (Inset magnifies SFG) *B*: Focal atrophy in left SFG; more posterior regions (arrows).

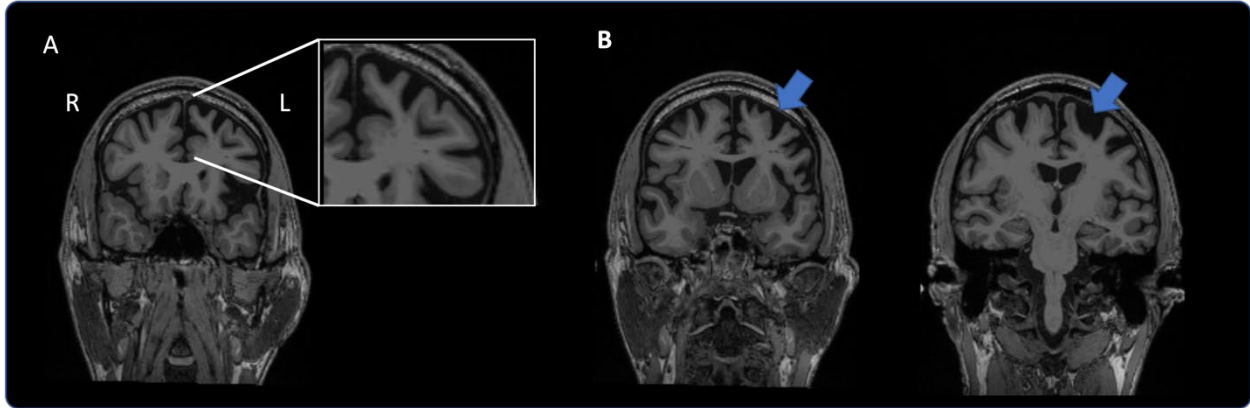

**Supplemental Figure 2.** Postmortem neuropathology, gross examination. (A) Superior view showing significant frontal atrophy (brain weight: 975 grams) with sharp demarcation of atrophy (arrows). (B) Coronal section of left frontal lobe showing severe cortical atrophy with shrunken gyri, expanded sulci, and yellowish discoloration of the subcortical white matter.

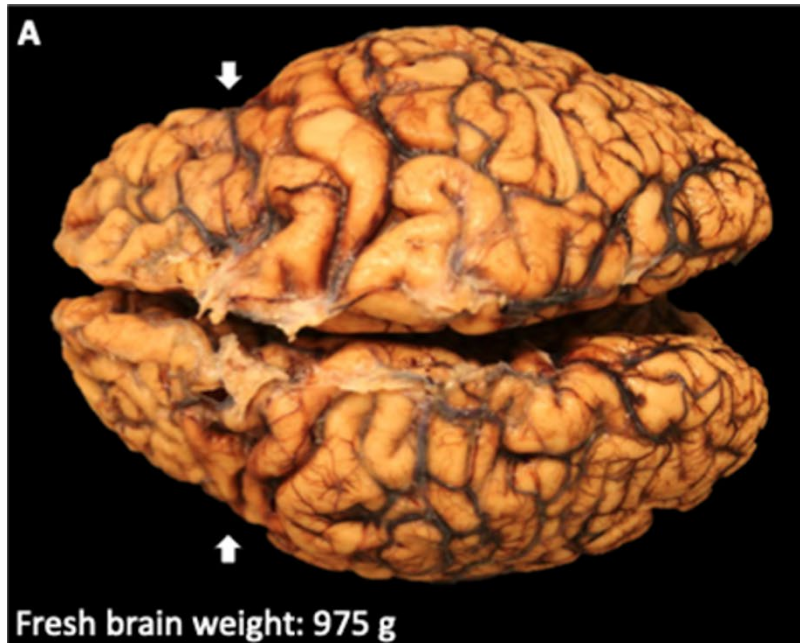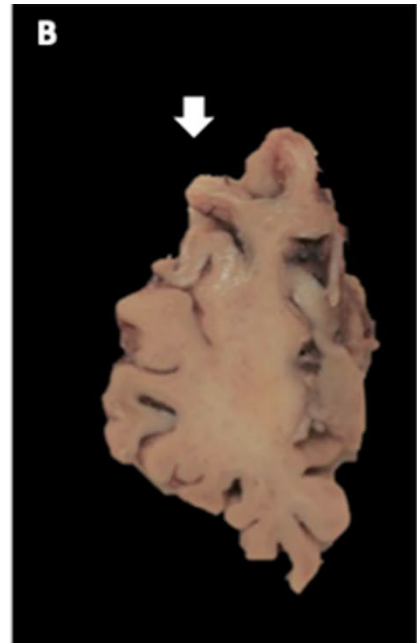

**Supplemental Figure 3.** Postmortem neuropathology, microscopic findings (hematoxylin & eosin). (A) Low-power image of cerebral cortex showing significant neuronal loss, gliosis, spongiform change, and gliotic white matter. (B) Medium-power image of cerebral cortex showing severe neuronal dropout and gliosis. (C) High-power view of dentate gyrus of hippocampus showing frequent, round, eosinophilic intracytoplasmic inclusions characteristic of Pick bodies (arrows). (D) Low-power view of temporal cortex highlighting ballooned neurons with abundant glassy eosinophilic cytoplasm with eccentric nuclei (arrows).

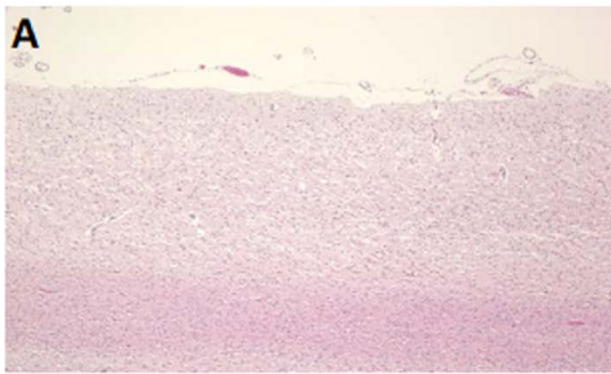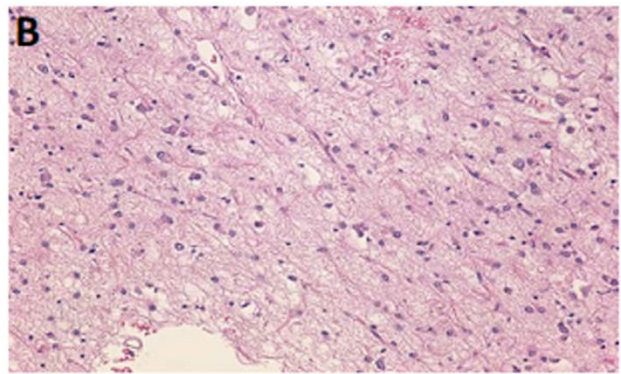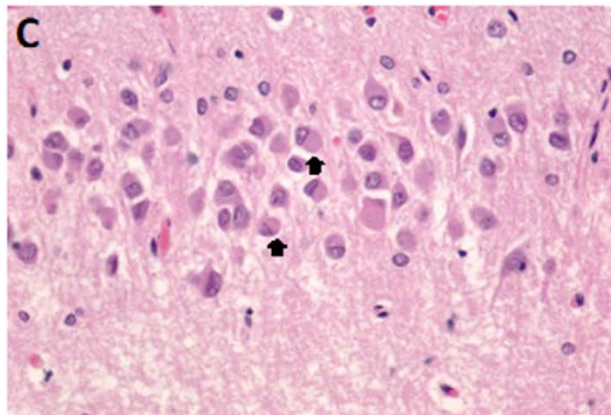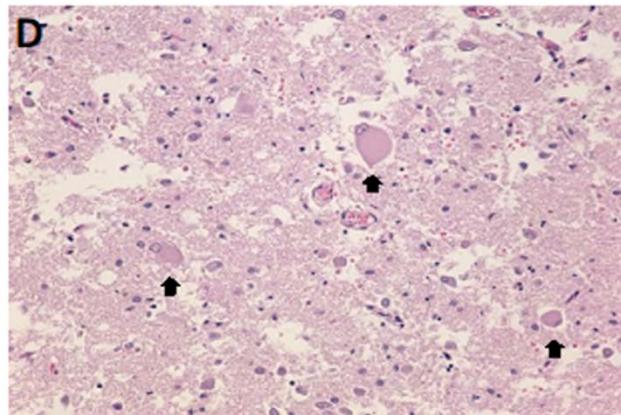

**Supplemental Table 1:** Detailed language assessment at presentation (Age 60; 2 years after symptom onset)

| <b>Domain</b>                                                                              | <b>Performance</b>                                                                                                                                                                                                                   |
|--------------------------------------------------------------------------------------------|--------------------------------------------------------------------------------------------------------------------------------------------------------------------------------------------------------------------------------------|
| <b>Expressive Language</b>                                                                 |                                                                                                                                                                                                                                      |
| Fluent?                                                                                    | Paucity, word-finding pauses                                                                                                                                                                                                         |
| Grammatical?                                                                               | Yes                                                                                                                                                                                                                                  |
| Phrase length?                                                                             | >6 words                                                                                                                                                                                                                             |
| Paraphasic, phonetic errors?                                                               | No                                                                                                                                                                                                                                   |
| Motor speech impairment?                                                                   | No                                                                                                                                                                                                                                   |
| Praxis                                                                                     | Normal upper limb, oro-buccal, instrumental and complex praxis                                                                                                                                                                       |
| <b>Fluency</b>                                                                             |                                                                                                                                                                                                                                      |
| Letter                                                                                     | 3 "P" words in one minute<br>FAS task 9: 2F/3A/4S (1 <sup>st</sup> %)                                                                                                                                                                |
| Category                                                                                   | 9 animals, 6 fruits, 5 vegetables in one minute (1 <sup>st</sup> %)                                                                                                                                                                  |
| Design                                                                                     | 12-25 <sup>th</sup> %                                                                                                                                                                                                                |
| Naming                                                                                     | BNT: 60/60<br>CSB: 63/64                                                                                                                                                                                                             |
| Writing                                                                                    | Provided reasonable written picture description and spontaneous written sentence, with intact spelling and grammar.                                                                                                                  |
| Reading                                                                                    | WAB Comprehension of Sentences: 40/40<br>WAB Reading Commands: 10/10 decoding; 10/10 performance                                                                                                                                     |
| Repetition                                                                                 | Intact for words, phrases, and sentences with only one word omission on the longest item<br>WAB Repetition: 96/100                                                                                                                   |
| Auditory Comprehension                                                                     | Able to follow short directions. Some difficulty with lengthy commands, especially when the agent completing the action appeared at the end of the sentence (e.g., "point to the pen with the book")<br>WAB Auditory Commands: 62/80 |
| BNT= Boston Naming Task<br>CSB= Cambridge Semantic Battery<br>WAB= Western Aphasia Battery |                                                                                                                                                                                                                                      |

**Supplemental Table 2:** Detailed neurobehavioral status examination in non-language cognitive domains at presentation (Age 60; 2 years after symptom onset)

| <b>Domain</b>                                                                                                                                                                                                                                                                                     | <b>Performance</b>                                                                                                                                                                                                                                                                                                                                                                                                                                                                                                            |
|---------------------------------------------------------------------------------------------------------------------------------------------------------------------------------------------------------------------------------------------------------------------------------------------------|-------------------------------------------------------------------------------------------------------------------------------------------------------------------------------------------------------------------------------------------------------------------------------------------------------------------------------------------------------------------------------------------------------------------------------------------------------------------------------------------------------------------------------|
| <b>Attention</b>                                                                                                                                                                                                                                                                                  | Digit span (9 <sup>th</sup> %):<br><ul style="list-style-type: none"> <li>- Forward: 5</li> <li>- Backward: 4</li> </ul> Spatial span:<br><ul style="list-style-type: none"> <li>- Forward: 5 (5<sup>th</sup> %)</li> <li>- Backward: 4 (9<sup>th</sup> %)</li> </ul>                                                                                                                                                                                                                                                         |
| <b>Orientation</b>                                                                                                                                                                                                                                                                                | Preserved                                                                                                                                                                                                                                                                                                                                                                                                                                                                                                                     |
| <b>Calculation</b>                                                                                                                                                                                                                                                                                | Quick, accurate, arithmetic performance<br>Serial sevens without error                                                                                                                                                                                                                                                                                                                                                                                                                                                        |
| <b>Executive function</b>                                                                                                                                                                                                                                                                         | Accurate and well-organized clock draw<br>Impulse Control<br><ul style="list-style-type: none"> <li>- CPT-II: High level of omissions, variability, and perseverative response (atypical)</li> <li>- Tower Test: short first move time, rule violations, impulsivity (atypical)</li> </ul> Abstract Reasoning<br><ul style="list-style-type: none"> <li>- 20 questions test: concrete approach (9<sup>th</sup> %)</li> </ul>                                                                                                  |
| <b>Memory</b>                                                                                                                                                                                                                                                                                     | CERAD Word List<br><ul style="list-style-type: none"> <li>- Encoded 3/7/7 over 3 trials, total 17/30 (10<sup>th</sup> %)</li> <li>- Freely recalled 8/10 after 5-minute delay (66<sup>th</sup> %)</li> <li>- Recognized 100% with one false positive (21<sup>st</sup> %)</li> </ul> Visual Memory<br><ul style="list-style-type: none"> <li>- Warrington Face Memory Test (95<sup>th</sup> %)</li> </ul> Verbal Memory<br><ul style="list-style-type: none"> <li>- Warrington Word Memory Test (25<sup>th</sup> %)</li> </ul> |
| <b>Visuospatial function</b>                                                                                                                                                                                                                                                                      | Accurate 3-dimensional cube drawing<br>Top-down organization on complex figure copy was very poor                                                                                                                                                                                                                                                                                                                                                                                                                             |
| <b>Global Function</b>                                                                                                                                                                                                                                                                            | MoCA: 28/30 with points lost for word fluency and repetition<br>DRS: 132/144<br>GDS: 4 (normal)<br>Pre-morbid intellectual abilities estimated in average range<br><ul style="list-style-type: none"> <li>- AMNART: 109</li> </ul>                                                                                                                                                                                                                                                                                            |
| AMNART = American version of the National Adult Reading Test<br>CERAD = Consortium to Establish a Registry for Alzheimer's Disease Word List task<br>CPT = Continuous Performance Task<br>DRS = Dementia Rating Scale<br>GDS = Global Deterioration Scale<br>MoCA = Montreal Cognitive Assessment |                                                                                                                                                                                                                                                                                                                                                                                                                                                                                                                               |
